# Supplementary material for: Genomic insights into rapid speciation within the world’s largest tree genus Syzygium
Source: PubMed Central journal article supplement (PMC9468008; doi:10.1038/s41467-022-32637-x), 2022-09-12
Supplement: 41467_2022_32637_MOESM3_ESM.pdf [file 41467_2022_32637_MOESM3_ESM.pdf]

## **Description of Additional Supplementary Files**

File name: Supplementary Data 1

Description: Species identity, collection location, and voucher information on the 292 *Syzygium* and outgroup accessions sequenced using Illumina HiSeqX technology.

File name: Supplementary Data 2

Description: Assembly and BUSCO information for the 292 Illumina-resequenced accessions.
